# Supplementary material for: Increased Bacterial Load and Expression of Antimicrobial Peptides in Skin of Barrier-Deficient Mice with Reduced Cancer Susceptibility
Source: PubMed Central journal article supplement (PMC4759621; doi:10.1038/jid.2015.383), 2016-01
Supplement: mmc1.pdf [file mmc1.pdf]

## Supplementary Figures

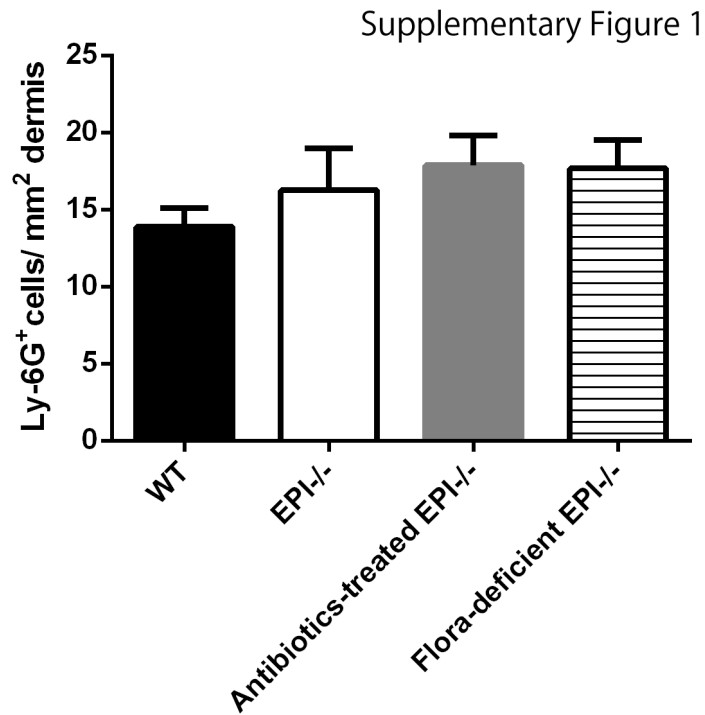

**Supplementary Figure 1. Quantification of Ly6G+ dermal cells.** Number of Ly6G+ cells per mm<sup>2</sup> dermis in WT, EPI<sup>-/-</sup>, antibiotics-treated EPI<sup>-/-</sup> and flora-deficient EPI<sup>-/-</sup> skin. Data are means  $\pm$  SEM from at least 4 mice per group. No statistically differences were found between groups.

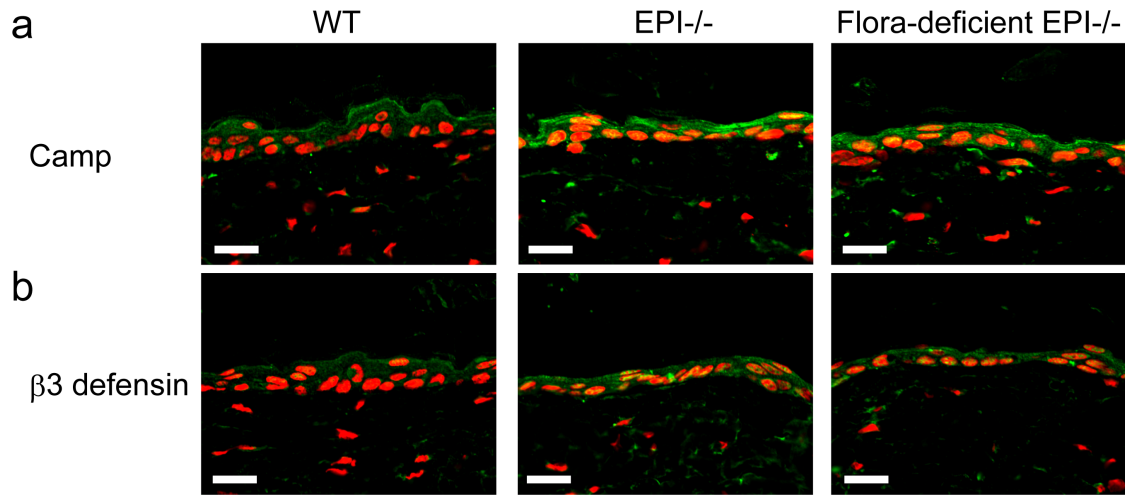

**Supplementary Figure 2. AMP expression in EPI-/- epidermis. (A, B)**

Immunofluorescence labelling of Camp (**A**) and  $\beta$ 3 defensin, encoded by Defb3, (**B**) in WT, EPI-/- and flora deficient EPI-/- skin (green fluorescence, with red propidium iodide nuclear counter-stain). Scale bars: 20  $\mu$ m.

### Supplementary Figure 3

#### Serpina1b

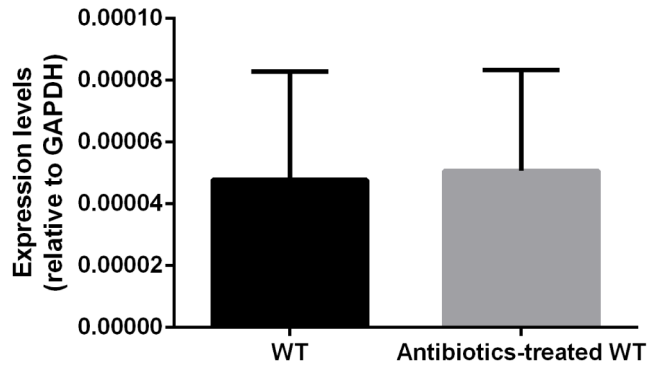

**Supplementary Figure 3. Serpina1b expression in WT epidermis treated with antibiotics.** qRT-PCR of Serpina1b in WT and antibiotic-treated WT epidermis. Data are means  $\pm$  SEM from 4 mice per group. No statistically significant differences were found between groups.
